# Differential stoichiometry among core ribosomal proteins

Nikolai Slavov<sup>a</sup>, Stefan Semrau<sup>b</sup>, Edoardo Airoidi<sup>a</sup>, Bogdan A. Budnik<sup>a</sup>,  
Alexander van Oudenaarden<sup>b</sup>

<sup>a</sup>Department of Statistics and FAS Center for Systems Biology,  
Harvard University, Cambridge, MA 02138, USA

<sup>b</sup>Hubrecht Institute, Royal Netherlands Academy of Arts and Sciences and  
University Medical Center Utrecht, Uppsalalaan 8, 3584 CT, Utrecht, The Netherlands

‡To whom correspondence should be addressed: [nslavov@alum.mit.edu](mailto:nslavov@alum.mit.edu)

**Understanding the regulation and structure of ribosomes is essential to understanding protein synthesis and its deregulation in disease. While ribosomes are believed to have a fixed stoichiometry among their core ribosomal proteins (RPs), some experiments suggest a more variable composition. Testing such variability requires direct and precise quantification of RPs. We used mass-spectrometry to directly quantify RPs across monosomes and polysomes of mouse embryonic stem cells (ESC) and budding yeast. Our data show that the stoichiometry among core RPs in wild-type yeast cells and ESC depends both on the growth conditions and on the number of ribosomes bound per mRNA. Furthermore, we find that the fitness of cells with a deleted RP-gene is inversely proportional to the enrichment of the corresponding RP in polysomes. Together, our findings support the existence of ribosomes with distinct protein composition and physiological function.**

## **Introduction**

Ribosomes catalyze protein synthesis but have only a few characterized roles in regulating translation (Mauro and Edelman, 2002; Xue and Barna, 2012). Rather, the most-studied molecular regulatory mechanisms of translation are mediated by eukaryotic initiation factors, RNA binding proteins, and microRNAs (Gingras *et al*, 1999; Hendrickson *et al*, 2009; Sonenberg and Hinnebusch, 2009; Fabian and Sonenberg, 2012). The characterized catalytic role of the ribosomes corresponds well to the model of the ribosome as a single complex with a fixed stoichiometry: 4 ribosomal RNAs and 80 core RPs (Warner, 1999; Ben-Shem *et al*, 2010, 2011), some of which are represented by several paralogous RPs. Despite the longstanding interest in ribosome structure and function, the exact stoichiometry and possible heterogeneity of the ribosomes have been challenging to measure directly (Weber, 1972; Westermann *et al*, 1976; Hardy, 1975). Such measurements are enabled by modern quantitative mass spectrometry (MS); reviewed by Bensimon *et al* (2012). Indeed, MS has transformed our understanding of protein complexes,

such as proteasomes (Wang *et al*, 2007) and nuclear pore complexes (Ori *et al*, 2013; Bui *et al*, 2013), by demonstrating variability among their protein subunits.

Studies of eukaryotic ribosomes (Mazumder *et al*, 2003; Galkin *et al*, 2007; Komili *et al*, 2007; Kondrashov *et al*, 2011; Topisirovic and Sonenberg, 2011; Horos *et al*, 2012; Lee *et al*, 2013; Tiruneh *et al*, 2013) have demonstrated that (i) genetic perturbations to the core RPs specifically affect the translation of some mRNAs and not others and (ii) mRNAs coding for core RPs are transcribed, spliced, and translated differentially across physiological conditions (Ramagopal and Ennis, 1981; Ramagopal, 1990; Brauer *et al*, 2008; Parenteau *et al*, 2011; Slavov and Dawson, 2009; Slavov and Botstein, 2011, 2013; O'Leary *et al*, 2013; Slavov *et al*, 2014; Jovanovic *et al*, 2015). These results suggest the hypothesis (Mauro and Edelman, 2002; Gilbert, 2011; Xue and Barna, 2012) that, depending on the tissue type and the physiological conditions, cells can alter the stoichiometry among the core RPs comprising the ribosomes and thus in turn alter the translational efficiency of distinct mRNAs. Alternatively, differential RP-expression can reflect extra ribosomal functions of the RPs (Mazumder *et al*, 2003; Wool, 1996; Warner and McIntosh, 2009). Furthermore, polysomes (multiple ribosomes per mRNA) from different cancer cell-lines have similar core RP stoichiometries (Reschke *et al*, 2013). Thus, the variable RP stoichiometry in the ribosomes of wild-type cells that is suggested by the ribosome specialization hypothesis remains unproven.

We sought to test whether wild-type cells have ribosomes with differential RP stoichiometry. For this test, we chose two divergent eukaryotes: budding yeast *Saccharomyces cerevisiae*, and mouse ESC. We chose budding yeast because of our previous observations that RPs are differentially transcribed across growth-rates (Slavov and Botstein, 2011, 2013) and that RP levels change differentially between glucose and ethanol carbon source (Slavov *et al*, 2014). To investigate whether such differential transcription of RPs affects the ribosomal composition, we used the same media as in our previous experiments, minimal media supplemented with 0.2 % glucose. In this media, unlike in rich media supplemented with 2 % glucose, yeast cells have a prominent monosomal peak that may reflect more translational regulation (Ashe *et al*, 2000; Castelli *et al*, 2011; Vaidyanathan *et al*, 2014). We chose embryonic stem cells

to test differential RP stoichiometry in wild-type mammalian cells because of the interesting phenotypes of RP deletions/knockdowns in ESC. For example, haploinsufficiency for Rps5, Rps14, or Rps28 interferes with ESC differentiation but not with their self-renewal (Fortier *et al*, 2015). Furthermore, unlike heteroploid cancer cell-lines grown in culture, ESC have a high monosomes-to-polysomes ratio, consistent with the possibility of more translational regulation (Sampath *et al*, 2008; Qiu *et al*, 2010; Ingolia *et al*, 2011; Fortier *et al*, 2015).

## Results

### Differential stoichiometry among core RPs in mouse ESC

To explore whether the stoichiometry among core RPs can vary, we first isolated monosomes and polysomes from exponentially growing mouse embryonic stem cells (ESC), doubling every 9 hours, Fig. EV1A. The ESC ribosomes were isolated by velocity–sedimentation in sucrose–gradients (Fig. 1A); see Methods. The profiles of the sucrose gradients are consistent with previous publications (Sampath *et al*, 2008; Qiu *et al*, 2010; Fortier *et al*, 2015) reporting that a large fraction of the ESC ribosomes are monosomal, not polysomal. To confirm that the prominent monosomal peak is reflective of ESC biology and not of poor ribosome fractionation, we also fractionated the ribosomes of neuroprogenitor cells derived from the ESC. Despite growing three times slower (doubling time 29 hours) than the ESC, the neuroprogenitor cells have a larger fraction of their ribosomes in polysomal complexes, Fig. EV1B. This observation confirms earlier findings by Sampath *et al* (2008), and thus further bolsters the conclusion that a low polysome-to-monomosomes ratio is characteristic of ESC.

Having isolated monosomes and polysomes, we sought to quantify their protein composition. The proteins from individual sucrose fractions were digested to peptides, labeled with tandem mass tags (TMT), and quantified on Orbitrap Elite based on the MS2 intensities of the TMT reporter ions; see Extended View Appendix. The monosomal sample was quantified in two replicas (1a and 1b), and the results indicate very high reproducibility ( $\rho = 0.92$ ; Fig. 1B). To control for protease and peptide biases, the proteins from each analyzed sucrose

fraction were digested either by trypsin (T) or by lys-C (L) and peptides from each digestion quantified independently. Because of the different specificity of trypsin and lys-C, most RP peptides (1058) were identified and quantified only in the trypsin or only in the lys-C digestion, while only 269 peptides were identified and quantified in both digestions. Thus, only very few peptide-specific biases (such as co-isolation interference) may be shared between the two digestions.

The measured levels of a unique peptide (a peptide present in a single RP) reflect the levels of the corresponding RP, post-translational modifications (PTMs) of the peptide (if any), and measurement error. We quantify on average ten distinct RP-peptides per RP (Fig. EV2A), and the levels of these peptides allow both the estimation of the RP levels and the consistency of these estimates. To depict both the estimates and their consistency, we display the full distributions of relative levels of all peptides unique to an RP as boxplots in Fig. 1C, D. The RP levels across the sucrose gradient (estimated as the median of the levels of unique peptides) indicate that some RPs are enriched in monosomes (Fig. 1C), while other RPs are enriched in polysomes (Fig. 1D). Each RP group includes proteins from both the large (60S) and the small (40S) subunits of the ribosomes and this differential loss of 40S or 60S cannot account for the RP levels displayed in Fig. 1C, D. Indeed, normalizing for the total amount of 40S and 60S proteins in each fraction does not alter significantly the results. The RP enrichment in Fig. 1 is substantially higher than the measurement noise, consistent across replicas and across distinct peptides, and highly statistically significant at false discovery rate (FDR)  $< 10^{-6}$ . The relative levels of all RPs with quantified unique peptides are displayed in Fig. 2 to illustrate the global pattern of RP levels across monosomes and polysomes. This pattern shows more RPs whose variability is consistent across replicas and enzymatic digestions. In contrast, the levels of RPs buried in the core of the ribosomes remain constant, with estimates fluctuating within the tight bounds of the measurement noise, Fig. 2. This fixed stoichiometry among RPs constituting the ribosomal core suggests that even ribosomes lacking some surface RPs likely have the same core structure; see Extended View Appendix.

In principle, if only a few peptides are quantified per RP, the measured peptide variability

might reflect reciprocal variability in corresponding PTM isoforms (if any) across the sucrose gradients, e.g., the unmodified isoform is enriched in monosomes and a phosphorylated isoform is enriched in polysomes. Such variable PTM isoforms (if any) are very interesting but cannot explain the data for an RP quantified by dozens of peptides spanning the protein length and indicating highly-consistent fold-changes across the sucrose gradient; see Fig. 1, Fig. EV2, and Extended View Appendix. We also investigate whether the differential levels of RPs may reflect the presence of ribosome biogenesis complexes or other extra-ribosomal complexes containing RPs and found that the levels of such complexes are too low to have a significant effect on the measured RP levels; see Fig. EV3 and Extended View Appendix. We further tested the RP variability with an independent method, Western blots, and in another strain of mouse ESC. Consistent with the MS data in Fig. 2, the Western Blots data (Fig. EV4) indicate that Rps29 and Rps14 are enriched in polysomes, Rpl11 is enriched in monosomes, and Rpl32 does not change beyond the measurement noise.

## Differential stoichiometry among core RPs in yeast

Having found differential stoichiometry among mouse RPs, we sought to further explore (i) whether such ribosome heterogeneity is conserved to budding yeast and (ii) whether the RP stoichiometry can change with growth conditions and metabolic state. To this end, we employed sucrose gradients to separate the ribosomes from yeast cells grown in minimal media with either glucose or ethanol as the sole source of carbon and energy (Slavov *et al*, 2014); see Extended View Appendix. Consistent with previous observations that the type and the concentration of the carbon source influence the ratio of monosomes to polysomes (Ashe *et al*, 2000; Castelli *et al*, 2011; Vaidyanathan *et al*, 2014), the ratio of monosomes to polysomes in our yeast cells grown in 0.4 % ethanol (Fig. 3A) or in 0.2 % glucose (Fig. 3B) is higher than is typically observed for yeast grown in rich media containing 2 % glucose. As in mouse, some RPs are enriched in monosomes (Fig. 3C) and others in polysomes (Fig. 3D, E). This enrichment is reproducible (correlation between replicas  $\rho = 97$ ; Fig. 3F) and consistent across independent unique peptides whose levels are shown as boxplot distribution in Fig. 3C-D.

The pattern of relative RP levels shown in Fig. 3C-E indicates that RP stoichiometry depends on two factors: on the number of ribosomes per mRNA (as in mouse) and on the carbon source in the growth media; the RP levels that are higher in glucose compared to ethanol also tend to increase with the number of ribosomes per mRNA (Fig. 3C-E). Furthermore, the ratios between the polysomal and monosomal levels of yeast RPs correlate to the corresponding ratios for their mouse orthologs (Fig. 3G;  $p$ -value  $< 0.03$ ), suggesting that the RP-stoichiometry differences between monosomes and polysomes are conserved across yeast and mouse.

Many yeast RPs are represented by two highly-homologous paralogs, and we explored whether the exchange among paralogs (one paralog substituting for the other) can account for the measured differential stoichiometry in Fig. 3E. The levels of paralogs localized on the surface of the ribosome, such as Rpl17a and Rpl17b, are positively correlated and thus inconsistent with paralog-exchange across the analyzed ribosomes (Fig. 3E). In contrast, RPs embedded deep in the core of the ribosomes either remain constant (the estimated fluctuations of their levels are within errorbars) or their paralogs exchange (e.g., the levels of Rpl37a and Rpl37b are anticorrelated; see Fig. 3E), indicating that each ribosome has a copy of Rpl37. In general, the RPs whose levels differ the most among the different fractions are located on the surface of the yeast ribosomes, as can be seen from their 3D colorcoded rendition in the Supporting PDB files and Movie 1.

## **RP enrichment in polysomes correlates to fitness**

Next, we tested the variability among RPs and its phenotypic consequences by independent fitness measurements. Our observation that the RP stoichiometry depends on the number of ribosomes bound per mRNA parallels measurements of higher translational activity of polysomes compared to monosomes (Warner *et al*, 1963; Goodman and Rich, 1963); some studies have even reported that the translational activity per ribosome increases with the number of ribosomes bound per mRNA (Noll *et al*, 1963; Wettstein *et al*, 1963), but this finding has not been widely reproduced. We therefore hypothesized that genetic deletions of RPs enriched in the more active ribosomes – as compared to RPs enriched in less active ribosomes – may result

in a larger decrease of the translation rate and thus lower fitness. To test this hypothesis, we computed the correlation (Fig. 4A) between the fitness of yeast strains with single RP-gene deletions (Qian *et al*, 2012) and the corresponding relative RP levels measured in the tetra-ribosomal fraction (4 ribosomes per mRNA). Consistent with our hypothesis, the fitness of strains lacking RP-genes is inversely proportional to the relative levels of the corresponding RPs in the tetra-ribosomes (Fig. 4A). Extending this correlation analysis to the RP-levels in all sucrose fractions shown in Fig. 3E results in a correlation pattern (Fig. 4B) that further supports our hypothesis by showing the opposite dependence for fractions with fewer ribosomes per mRNA: the fitness of strains lacking RP-genes is proportional to the relative levels of the corresponding RPs in fractions with fewer ribosomes per mRNA (Fig. 4B). This correlation pattern holds both for ethanol and for glucose carbon sources. To mitigate possible artifacts in the fitness data due to potential chromosome duplications in the deletion strains, we computed the correlations between the RP-levels and the fitness of the corresponding RP-deletion strains only for RPs without paralogs (thus unlikely to be affected by chromosome duplication) and found much higher magnitudes of the correlations (Fig. 4A, B). This result suggests that the differential RP stoichiometry is not limited to paralogous RPs substituting for each other.

To further explore the functional significance of the differential RP stoichiometry, we examined whether polysome-enriched RPs are preferentially induced at higher growth-rates. We previously found that the degree of growth-rate-dependent transcriptional induction varies significantly across RPs (Brauer *et al*, 2008; Slavov and Botstein, 2011, 2013; Slavov *et al*, 2012). We quantified the growth-rate responses of RPs by regressing their mRNA levels on growth-rates and computing growth rate-slopes. The magnitudes of RP growth-rate slopes range from positive (mRNA levels increase with increasing growth rate) to negative (mRNA levels decrease with increasing growth rate), see Fig. EV5. Analogously to our fitness analysis (Fig. 4A), we correlated the growth-rate slopes to the relative RP levels from Fig. 3E. Consistent with our hypothesis, the correlation pattern (Fig. 4C) indicates that the higher the growth-rate slope of a RP, the higher its enrichment in sucrose-fractions corresponding to increasing numbers of ribosomes per mRNA.



We extended our fitness analysis from yeast to mouse using the published depletion data from CRISPR knockouts in human ESC (Shalem *et al*, 2014); see Extended View Appendix. We used BLAST to identify the closest mouse orthologs of each human RP with depletion data (Fig. 4D), and correlated the fitness of human ESC lacking the human RP orthologs to the RP levels across sucrose fractions that we measured, Fig. 2. The correlation pattern (Fig. 4E) is similar to the one in yeast (Fig. 4A-C) and highly significant, FDR < 0.1%. This pattern indicates that the fitness of ESC lacking RP-genes is directly proportional to the relative RP levels in monosomes and inversely proportional to the relative RP levels in polysomes. The magnitude of this inverse proportionality increases with the number of ribosomes per mRNA (Fig. 4E), consistent with our hypothesis. The fact that the fitness of human ESC lacking RPs correlates significantly to the levels of the corresponding mouse orthologous RPs suggests that the differential RP stoichiometry and its biological functions are likely conserved across mouse and human. The magnitude of this correlation increases when the correlation is computed based only on the orthologs whose sequences are over 80% identical between mouse and human (Fig. 4E), providing further evidence for the conserved fitness consequences of the altered RP stoichiometry.

## Discussion

For decades, the ribosome has been considered the preeminent example of a large RNA–protein complex with a fixed stoichiometry among the constituent core RPs (Warner, 1999; Ben-Shem *et al*, 2010, 2011). However, the direct and precise measurements of RP–levels required to support this view have been very challenging. Prior to our work, the most direct and precise quantification of RP stoichiometry that we know of is based on measuring the radioactivity from RPs labeled with  $^{14}\text{C}$  or  $^3\text{H}$  and separated on 2D–gels. Some of these studies (Weber, 1972; Westermann *et al*, 1976) achieved very high precision (standard error < 10 %) and reported over 2–fold deviation from 1 : 1 stoichiometry for multiple RPs. Other studies of prokaryotic ribosomes (Hardy, 1975) achieved lower precision, and the deviation from 1 : 1 stoichiome-

try was within the experimental error of the measurements. The results reported in ref. (Weber, 1972; Westermann *et al*, 1976; Hardy, 1975) are all consistent with our findings, albeit our measurements are limited to eukaryotic ribosomes. This prior work and our measurements reflect population–averages across a heterogeneous pool of ribosomes and thus likely underestimate the magnitude of the variability among RP stoichiometries.

A simple mechanism that may account for our observations is that the rates of translation initiation and elongation depend on the RP composition. Ribosomes whose RP composition corresponds to higher ratios between the initiation and the elongation rates are likely to be found in fractions with multiple ribosomes per mRNA. Conversely, ribosomes whose RP composition corresponds to lower ratios between the initiation and the elongation rates are likely to be found in fractions with fewer ribosomes per mRNA. Indeed, increased growth–rate on glucose carbon–source that we find associated with altered RP stoichiometry has been previously reported to be associated with faster elongation rates (Bonven and Gulløv, 1979; Young and Bremer, 1976).

Our data show that the stoichiometry among RPs varies across ribosomes from different sucrose fractions. However, velocity sedimentation in sucrose gradients is unlikely to perfectly separate ribosomes based on their RP composition. For example, short mRNAs and the ribosomes translating them can be found only in the fractions containing few ribosomes per mRNA regardless of the efficiency of translation and the RP-composition of the ribosomes (Arava *et al*, 2003). Similarly, even the most highly translated mRNA that is likely to be translated by polysome-type ribosomes will go through a stage when only a single ribosome is loaded and thus will be found in the monosomal fraction. Other factors may also contribute to the mixing of different ribosomes in each sucrose fraction, including variation in the mRNA length, any degree of ribosome run-off, and mRNA shearing during sample handling, if any. None of these factors, however, is likely to artifactually contribute to the differential RP stoichiometry that we observe. Rather, the presence of ribosomes with different RP compositions in the same sucrose fraction would average out and decrease the differences, resulting in underestimation of the RP variability.

The conserved difference between monosomal and polysomal ribosomes (Fig. 3G) raises

the question about the activity of monosomes, especially given the lower estimates for their transnational activity (Warner *et al*, 1963; Wettstein *et al*, 1963). The RP levels in Fig. 3E indicate that the RP composition of trisomes in ethanol is more similar to the composition of monosomes than to tetrasomes. This observation shows that monosomes may have similar RP composition to polysomes, suggesting that the RP composition of monosomes is not necessarily indicative of a non-functional state.

The correlations between RP-composition and fitness can be explained by the expectation that the higher the translational activity of a ribosome, the higher the fitness cost of its perturbation in rapidly growing stem cells. The key factor required for this expectation is the variable ribosomal composition that we measured. The variable RP stoichiometry in the absence of external perturbations suggests that cells use variable RP composition of their ribosomes as a regulatory mechanism of protein synthesis. One such example might be the preferential transcriptional induction of polysome-enriched RPs at higher growth rates (Fig. 4C).

Variable mammalian RPs, such as Rps4x, Rps14, Rps20, Rpl5, Rpl10, and Rpl27, directly bind mRNAs (Castello *et al*, 2012; Kwon *et al*, 2013), and this binding might mediate translational regulation as previously suggested (Mauro and Edelman, 2002; Mazumder *et al*, 2003; Xue *et al*, 2015). Furthermore, deletions or overexpressions of many of the variable RPs (Fig. 1B) have well characterized phenotypes both in development and in cancer. For example, the knockdown or haploinsufficiency of the polysomally enriched Rps19 (Fig. 1B) causes Diamond Blackfan anemia by selectively affecting the synthesis of some proteins but not of others (Horos *et al*, 2012). Interestingly, our data indicate that RPs that are frequently mutated in cancers, such as Rpl5 and Rpl10 (De Keersmaecker *et al*, 2013; Lawrence *et al*, 2014), are enriched in the monosomes (Fig. 1A and Fig. 2). Conversely, RPs whose (over)-expression promotes cancer, such as Rpl30, Rps20, and Rpl39 (De Bortoli *et al*, 2006; Dave *et al*, 2014), are enriched in the polysomes (Fig. 1B and Fig. 2). One interpretation, among others, of these data is that loss of function of monosomally-enriched RPs or overexpression of polysomally-enriched RPs might promote protein synthesis and cancer cell growth.

## Materials and Methods

All yeast experiments used a prototrophic diploid strain (DBY12007) with a S288c background and wild type HAP1 alleles (Hickman and Winston, 2007). We grew our cultures in a bioreactor (LAMBDA Laboratory Instruments) using minimal media with the composition of yeast nitrogen base (YNB) and supplemented with 2g/L D-glucose. Before inoculation, the reactor was filled with 2L of minimal media and warmed up to a working temperature of 30°C.

Mouse embryonic stem cells (E14 10<sup>th</sup> passage) were grown as adherent cultures in 10 cm plates with 10 ml DMEM/F12 media supplemented with 10 % knockout serum replacement, nonessential amino acids (NEAA supplement), 0.1 mM  $\beta$ -mercapto-ethanol, 1 % penicillin and streptomycin, leukemia inhibitory factor (LIF; 1,000 U LIF/ml), and 2i (GSK3 $\beta$  and Mek 1/2 inhibitors).

Both yeast and mouse embryonic stem cells were lysed by vortexing for 10 min with glass beads in cold PLB (20 mM HEPES-KOH at pH 7.4, 1 % Triton X-100, 2 mM Magnesium Acetate, 100 mM Potassium Acetate, 0.1 mg/ml cycloheximide, and 3 mM DTT). The crude extracts obtained from this lysis procedure were clarified by centrifugation. The resulting supernatants were applied to linear 11 ml sucrose gradients (10 % – 50 %) and spun at 35,000 rpm in a Beckman SW41 rotor either for 3 hours (for yeast samples) or for 2.5 hours (for mouse samples). Twelve fractions from each sample were collected using a Gradient Station. More details are available in the Extended View Appendix.

## Acknowledgments

We thank J. Cate and N. Lintner for helping us colorcode the variability of RPs on the 3D structure of the yeast ribosomes, P. Vaidyanathan for help with the sucrose gradients, R. Robertson for technical assistance, and M. Jovanovic, S. Kryazhimskiy, W. Gilbert, P. Vaidyanathan, Y. Katz, G. Frenkel, D. Mooijman, J. Alvarez, D. Botstein, and A. Murray for discussions and constructive comments. This work was funded by a grant from the National Institutes of Health to A.v.O. (R01-GM068957) and Alfred P Sloan Research Fellowship to E.M.A.

## Author Contributions

N.S designed research and experimental procedures. N.S., S.S. and B.B. performed experiments and collected data. N.S., A.v.O. and E.A. analyzed the data. N.S. and A.v.O. discussed the results and wrote the manuscript.

## Conflict of Interest

The authors declare no conflict of interest.

## References

- Arava Y, Wang Y, Storey JD, Liu CL, Brown PO, Herschlag D (2003) Genome-wide analysis of mRNA translation profiles in *Saccharomyces cerevisiae*. *Proceedings of the National Academy of Sciences* **100**: 3889–3894
- Ashe MP, Susan K, Sachs AB (2000) Glucose depletion rapidly inhibits translation initiation in yeast. *Molecular Biology of the Cell* **11**: 833–848
- Ben-Shem A, de Loubresse NG, Melnikov S, Jenner L, Yusupova G, Yusupov M (2011) The structure of the eukaryotic ribosome at 3.0 Å resolution. *Science* **334**: 1524–1529
- Ben-Shem A, Jenner L, Yusupova G, Yusupov M (2010) Crystal structure of the eukaryotic ribosome. *Science* **330**: 1203–1209
- Bensimon A, Heck AJ, Aebersold R (2012) Mass spectrometry-based proteomics and network biology. *Annual review of biochemistry* **81**: 379–405
- Bonven B, Gulløv K (1979) Peptide chain elongation rate and ribosomal activity in *Saccharomyces cerevisiae* as a function of the growth rate. *Molecular and General Genetics MGG* **170**: 225–230

- Brauer MJ, Huttenhower C, Airoidi EM, Rosenstein R, Matese JC, Gresham D, Boer VM, Troyanskaya OG, Botstein D (2008) Coordination of Growth Rate, Cell Cycle, Stress Response, and Metabolic Activity in Yeast. *Mol Biol Cell* **19**: 352–367
- Bui KH, von Appen A, DiGuilio AL, Ori A, Sparks L, Mackmull MT, Bock T, Hagen W, Andrés-Pons A, Glavy JS, *et al* (2013) Integrated structural analysis of the human nuclear pore complex scaffold. *Cell* **155**: 1233–1243
- Castelli LM, Lui J, Campbell SG, Rowe W, Zeef LA, Holmes LE, Hoyle NP, Bone J, Selley JN, Sims PF, *et al* (2011) Glucose depletion inhibits translation initiation via eIF4A loss and subsequent 48S preinitiation complex accumulation, while the pentose phosphate pathway is coordinately up-regulated. *Molecular biology of the cell* **22**: 3379–3393
- Castello A, Fischer B, Eichelbaum K, Horos R, Beckmann BM, Strein C, Davey NE, Humphreys DT, Preiss T, Steinmetz LM, *et al* (2012) Insights into RNA biology from an atlas of mammalian mRNA–binding proteins. *Cell* **149**: 1393–1406
- Dave B, Granados-Principal S, Zhu R, Benz S, Rabizadeh S, Soon-Shiong P, Yu KD, Shao Z, Li X, Gilcrease M, *et al* (2014) Targeting RPL39 and MLF2 reduces tumor initiation and metastasis in breast cancer by inhibiting nitric oxide synthase signaling. *Proceedings of the National Academy of Sciences* : 201320769
- De Bortoli M, Castellino RC, Lu XY, Deyo J, Sturla LM, Adesina AM, Perlaky L, Pomeroy SL, Lau CC, Man TK, *et al* (2006) Medulloblastoma outcome is adversely associated with overexpression of EEF1D, RPL30, and RPS20 on the long arm of chromosome 8. *BMC cancer* **6**: 223
- De Keersmaecker K, Atak ZK, Li N, Vicente C, Patchett S, Girardi T, Gianfelici V, Geerdens E, Clappier E, Porcu M, *et al* (2013) Exome sequencing identifies mutation in CNOT3 and ribosomal genes RPL5 and RPL10 in T-cell acute lymphoblastic leukemia. *Nature genetics* **45**: 186–190

- Fabian MR, Sonenberg N (2012) The mechanics of miRNA-mediated gene silencing: a look under the hood of miRISC. *Nature structural molecular biology* **19**: 586–593
- Fortier S, MacRae T, Bilodeau M, Sargeant T, Sauvageau G (2015) Haploinsufficiency screen highlights two distinct groups of ribosomal protein genes essential for embryonic stem cell fate. *Proceedings of the National Academy of Sciences* **112**: 2127–2132
- Galkin O, Bentley AA, Gupta S, Compton BA, Mazumder B, Kinzy TG, Merrick WC, Hatzoglou M, Pestova TV, Hellen CU, *et al* (2007) Roles of the negatively charged N-terminal extension of *Saccharomyces cerevisiae* ribosomal protein S5 revealed by characterization of a yeast strain containing human ribosomal protein S5. *RNA* **13**: 2116–2128
- Gilbert WV (2011) Functional specialization of ribosomes? *Trends in biochemical sciences* **36**: 127–132
- Gingras AC, Raught B, Sonenberg N (1999) eIF4 initiation factors: effectors of mRNA recruitment to ribosomes and regulators of translation. *Annual review of biochemistry* **68**: 913–963
- Goodman HM, Rich A (1963) Mechanism of polyribosome action during protein synthesis. *Nature* **199**: 318–322
- Hardy SJ (1975) The stoichiometry of the ribosomal proteins of *Escherichia coli*. *Molecular and General Genetics MGG* **140**: 253–274
- Hendrickson DG, Hogan DJ, McCullough HL, Myers JW, Herschlag D, Ferrell JE, Brown PO (2009) Concordant regulation of translation and mRNA abundance for hundreds of targets of a human microRNA. *PLoS biology* **7**: e1000238
- Hickman M, Winston F (2007) Heme levels switch the function of Hap1 of *Saccharomyces cerevisiae* between transcriptional activator and transcriptional repressor. *Molecular and Cellular Biology* **27**: 7414–7424
- Horos R, IJspeert H, Pospisilova D, Sendtner R, Andrieu-Soler C, Taskesen E, Nieradka A, Cmejla R, Sendtner M, Touw IP, *et al* (2012) Ribosomal deficiencies in Diamond–Blackfan

- anemia impair translation of transcripts essential for differentiation of murine and human erythroblasts. *Blood* **119**: 262–272
- Ingolia NT, Lareau LF, Weissman JS (2011) Ribosome profiling of mouse embryonic stem cells reveals the complexity and dynamics of mammalian proteomes. *Cell* **147**: 789–802
- Jovanovic M, Rooney MS, Mertins P, Przybylski D, Chevrier N, Satija R, Rodriguez EH, Fields AP, Schwartz S, Raychowdhury R, *et al* (2015) Dynamic profiling of the protein life cycle in response to pathogens. *Science* **347**: 1259038
- Komili S, Farny NG, Roth FP, Silver PA (2007) Functional specificity among ribosomal proteins regulates gene expression. *Cell* **131**: 557–571
- Kondrashov N, Pusic A, Stumpf CR, Shimizu K, Hsieh AC, Xue S, Ishijima J, Shiroishi T, Barna M (2011) Ribosome-mediated specificity in Hox mRNA translation and vertebrate tissue patterning. *Cell* **145**: 383–397
- Kwon SC, Yi H, Eichelbaum K, Föhr S, Fischer B, You KT, Castello A, Krijgsveld J, Hentze MW, Kim VN (2013) The RNA-binding protein repertoire of embryonic stem cells. *Nature structural molecular biology*
- Lawrence MS, Stojanov P, Mermel CH, Robinson JT, Garraway LA, Golub TR, Meyerson M, Gabriel SB, Lander ES, Getz G (2014) Discovery and saturation analysis of cancer genes across 21 tumour types. *Nature* **505**: 495–501
- Lee ASY, Burdeinick-Kerr R, Whelan SP (2013) A ribosome-specialized translation initiation pathway is required for cap-dependent translation of vesicular stomatitis virus mRNAs. *Proceedings of the National Academy of Sciences* **110**: 324–329
- Mauro VP, Edelman GM (2002) The ribosome filter hypothesis. *Proceedings of the National Academy of Sciences* **99**: 12031–12036



- Mazumder B, Sampath P, Seshadri V, Maitra RK, DiCorleto PE, Fox PL (2003) Regulated release of L13a from the 60S ribosomal subunit as a mechanism of transcript-specific translational control. *Cell* **115**: 187–198
- Noll H, Staehelin T, Wettstein F (1963) Ribosomal aggregates engaged in protein synthesis: ergosome breakdown and messenger ribonucleic acid transport. *Nature* **198**: 632–638
- O’Leary MN, Schreiber KH, Zhang Y, Duc ACE, Rao S, Hale JS, Academia EC, Shah SR, Morton JF, Holstein CA, *et al* (2013) The ribosomal protein Rpl22 controls ribosome composition by directly repressing expression of its own paralog, Rpl2211. *PLoS genetics* **9**: e1003708
- Ori A, Banterle N, Iskar M, Andrés-Pons A, Escher C, Khanh Bui H, Sparks L, Solis-Mezarino V, Rinner O, Bork P, *et al* (2013) Cell type-specific nuclear pores: a case in point for context-dependent stoichiometry of molecular machines. *Molecular systems biology* **9**
- Parenteau J, Durand M, Morin G, Gagnon J, Lucier JF, Wellinger RJ, Chabot B, Abou Elela S (2011) Introns within ribosomal protein genes regulate the production and function of yeast ribosomes. *Cell* **147**: 320–331
- Qian W, Ma D, Xiao C, Wang Z, Zhang J (2012) The genomic landscape and evolutionary resolution of antagonistic pleiotropy in yeast. *Cell Reports* **2**: 1399–1410
- Qiu C, Ma Y, Wang J, Peng S, Huang Y (2010) Lin28-mediated post-transcriptional regulation of Oct4 expression in human embryonic stem cells. *Nucleic acids research* **38**: 1240–1248
- Ramagopal S (1990) Induction of cell-specific ribosomal proteins in aggregation competent nonmorphogenetic *Dictyostelium discoideum*. *Biochemistry and Cell Biology* **68**: 1281–1287
- Ramagopal S, Ennis HL (1981) Regulation of synthesis of cell-specific ribosomal proteins during differentiation of *Dictyostelium discoideum*. *Proceedings of the National Academy of Sciences* **78**: 3083–3087

- Reschke M, Clohessy JG, Seitzer N, Goldstein DP, Breitkopf SB, Schmolze DB, Ala U, Asara JM, Beck AH, Pandolfi PP (2013) Characterization and Analysis of the Composition and Dynamics of the Mammalian Riboproteome. *Cell Reports* **4**: 1276–1287
- Sampath P, Pritchard DK, Pabon L, Reinecke H, Schwartz SM, Morris DR, Murry CE (2008) A hierarchical network controls protein translation during murine embryonic stem cell self-renewal and differentiation. *Cell stem cell* **2**: 448–460
- Shalem O, Sanjana NE, Hartenian E, Shi X, Scott DA, Mikkelsen TS, Heckl D, Ebert BL, Root DE, Doench JG, *et al* (2014) Genome-scale CRISPR-Cas9 knockout screening in human cells. *Science* **343**: 84–87
- Slavov N, Airoidi EM, van Oudenaarden A, Botstein D (2012) A conserved cell growth cycle can account for the environmental stress responses of divergent eukaryotes. *Molecular Biology of the Cell* **23**: 1986 – 1997
- Slavov N, Botstein D (2011) Coupling among growth rate response, metabolic cycle, and cell division cycle in yeast. *Molecular Biology of the Cell* **22**: 1997–2009
- Slavov N, Botstein D (2013) Decoupling Nutrient Signaling from Growth Rate Causes Aerobic Glycolysis and Deregulation of Cell-Size and Gene Expression. *Molecular Biology of the Cell* **24**: 157–168
- Slavov N, Budnik B, Schwab D, Airoidi E, van Oudenaarden A (2014) Constant Growth Rate Can Be Supported by Decreasing Energy Flux and Increasing Aerobic Glycolysis. *Cell Reports* **7**: 705 – 714
- Slavov N, Dawson KA (2009) Correlation signature of the macroscopic states of the gene regulatory network in cancer. *Proceedings of the National Academy of Sciences* **106**: 4079–4084
- Sonenberg N, Hinnebusch AG (2009) Regulation of translation initiation in eukaryotes: mechanisms and biological targets. *Cell* **136**: 731–745

- Tiruneh BS, Kim BH, Gallie DR, Roy B, von Arnim AG (2013) The global translation profile in a ribosomal protein mutant resembles that of an eIF3 mutant. *BMC biology* **11**: 123
- Topisirovic I, Sonenberg N (2011) Translational control by the eukaryotic ribosome. *Cell* **145**: 333–334
- Vaidyanathan PP, Zinshteyn B, Thompson MK, Gilbert WV (2014) Protein kinase A regulates gene-specific translational adaptation in differentiating yeast. *RNA* : 10.1261/rna.044552.114
- Wang X, Chen CF, Baker PR, Chen PI, Kaiser P, Huang L (2007) Mass spectrometric characterization of the affinity-purified human 26S proteasome complex. *Biochemistry* **46**: 3553–3565
- Warner JR (1999) The economics of ribosome biosynthesis in yeast. *Trends in biochemical sciences* **24**: 437–440
- Warner JR, Knopf PM, Rich A (1963) A multiple ribosomal structure in protein synthesis. *Proceedings of the National Academy of Sciences of the United States of America* **49**: 122
- Warner JR, McIntosh KB (2009) How common are extraribosomal functions of ribosomal proteins? *Molecular cell* **34**: 3–11
- Weber HJ (1972) Stoichiometric measurements of 30S and 50S ribosomal proteins from *Escherichia coli*. *Molecular and General Genetics MGG* **119**: 233–248
- Westermann P, Heumann W, Bielka H (1976) On the stoichiometry of proteins in the small ribosomal subunit of hepatoma ascites cells. *FEBS letters* **62**: 132–135
- Wettstein F, Staehelin T, Noll H (1963) Ribosomal aggregate engaged in protein synthesis: characterization of the ergosome. *Nature* **197**: 430–435
- Wool IG (1996) Extraribosomal functions of ribosomal proteins. *Trends in biochemical sciences* **21**: 164–165
- Xue S, Barna M (2012) Specialized ribosomes: a new frontier in gene regulation and organismal biology. *Nature Reviews Molecular Cell Biology* **13**: 355–369

Xue S, Tian S, Fujii K, Kladwang W, Das R, Barna M (2015) RNA regulons in Hox 5'-UTRs confer ribosome specificity to gene regulation. *Nature* **517**: 33–38

Young R, Bremer H (1976) Polypeptide-chain-elongation rate in *Escherichia coli* B/r as a function of growth rate. *Biochem J* **160**: 185–194

## Figure Captions

**Figure 1. The stoichiometry among core RPs in mouse ribosomes depends on the number of ribosomes per mRNA.** (A) Sucrose gradients allow separating ribosomes that are free or bound to a single mRNA (monosomes, depicted in black) from multiple ribosomes bound to a single mRNA (polysomes, depicted in blue). The absorbance at 254 nm reflects RNA levels, mostly ribosomal RNA. The vertical dashed lines indicate the boundaries of the collected fractions. (B) Replica MS measurements of the monosomes (1a and 1b) indicate reproducible estimates for RP enrichment in polysomes. (C) Some RPs are enriched in monosomes and others in polysomes (D). The relative levels of each RP are quantified as the median levels of its unique peptides, and the probability that the RP levels do not change across the quantified fractions is computed from ANOVA (indicated at the top). The distributions of levels of all unique peptides from trypsin (left panels) and from lys-C (right panels) digestions are juxtaposed as boxplots to depict the consistency of the estimates across proteases, different peptides, and experiments. To correct for variation in the total amount of ribosomes present in each fraction, the mean of the intensities of all RP peptides was normalized to 1 for each fraction. On each box, the central line is the median, the edges of the box are the 25<sup>th</sup> and 75<sup>th</sup> percentiles, and the whiskers extend to the most extreme data points.

**Figure 2. Global pattern of differential stoichiometry among mouse RPs across sucrose gradients.** The relative levels of core RPs in monosomes and polysomes were quantified by MS and found to vary depending on the number of ribosomes bound per mRNA. The measurement noise was estimated by (i) replica quantification of the monosomal fraction (by using different tandem-mass-tags reporter ions, 126 or 131) and by (ii) estimating RP levels separately using either trypsin (T) or lys-C (L) digestion, as indicated at the bottom of each column. The  $\log_2$  levels of each RP are shown relative to their mean. See Extended View Appendix and [Figure EV1](#) for more details and error estimates.

**Figure 3. The stoichiometry among core RPs in yeast ribosomes depends both on the number of ribosomes per mRNA and on the physiological condition.** Ribosomes from either ethanol (A) or glucose (B) grown yeast were separated by velocity sedimentation in sucrose gradients. Depiction is as in Fig. 1A. (C) Rpl35b is enriched in monosomes ( $p < 10^{-3}$ ) and in ethanol carbon source ( $p < 10^{-3}$ ). Depiction is as in Fig. 1. The p value at the top is computed from ANOVA and quantifies the probability of observing the variability of Rpl35b peptides by chance. (D) Rpl26a is enriched in polysomes ( $p < 10^{-9}$ ) and in glucose carbon source ( $p < 10^{-4}$ ). (E) Levels of core RPs in the sucrose fractions estimated from their unique peptides quantified by MS. The RP levels vary depending on the carbon source (glucose or ethanol) and on the number of ribosomes bound per mRNA, indicated at the top. Monosomes from ethanol grown yeast were quantified in two biological replicas (first two columns). The  $\log_2$  levels of each RP are shown relative to their mean. See Supporting Movie 1 and PDB files for color-coded depiction of these data on the 3D structure of the yeast ribosome. (F) The RP fold-changes between the tetrasomes of yeast grown in glucose carbon source and the monosomes of yeast grown in ethanol carbon source are highly reproducible. The ethanol samples were collected and processed independently and compared to the glucose tetrasomes. (G) The  $\log_2$  ratios between polysomal and monosomal levels of mouse RPs are plotted against the corresponding  $\log_2$  ratios of their orthologous yeast RPs. The significant (p-value  $< 0.03$ ) positive correlation between these ratios suggests that the RP-stoichiometry differences are conserved across yeast and mouse. The plot includes all orthologous RP pairs with over 65% sequence identity between yeast and mouse.

**Figure 4. The relative levels of RPs across monosomes and polysomes correlate significantly to the fitness of yeast and mammalian cells lacking the genes encoding these RPs.** (A) The fitness of RP-deleted yeast strains (Qian *et al*, 2012) is inversely proportional (p-value  $< 4 \times 10^{-3}$ ) to the relative levels of the corresponding RPs in tetrasomes from yeast growing on ethanol carbon source. The RPs without paralogs are marked with red squares. (B) Extension of the analysis in panel (A) to all sucrose fractions: correlations between the relative RP levels from Fig. 3E and the fitnesses of strains lacking the corresponding RP genes (Qian *et al*, 2012). The correlations are shown either for all quantified RPs or only for RPs without paralogs. (C) Correlations between the relative levels of the RPs from Fig. 3E and their transcriptional growth-rate responses (slopes). The growth-rate slopes were previously computed by regressing ( $R^2 > 0.87$ ) the levels of mRNAs in glucose-limited steady-state cultures of yeast against the growth-rates of the cultures (Brauer *et al*, 2008; Slavov and Botstein, 2011). (D) Distribution of sequence identity between human RPs and their closest mouse orthologs; the sequences and annotations for RPs are from Swiss-Prot. (E) Extension of the analysis for yeast in panels (A-B) to mouse: correlations between the relative levels of mouse RPs from Fig. 2 and the fitness of human ESC lacking the corresponding human ortholog (Shalem *et al*, 2014). The correlations are shown either for all quantified RPs or only for RPs whose sequence identity between mouse and human exceeds 80 %. All error bars are standard deviations from bootstrapping.

## Expanded View Figure Captions

**Figure EV1. Multiple unique peptides per RP provide consistent fold-change estimates for most RPs.** (A) Growth curve of mouse ESCs. At time 0h, 15 ESC cultures were started, and at each time point indicated on the x-axis, one culture was harvested to determine the cell number (y-axis). The cell number is plotted on a log-scale. The data indicate rapid exponential growth at a doubling time of about 9 hours. The ESCs used for our analysis were harvested during the middle of the curve, 35 h after starting the cultures. (B) Sucrose gradient of neuroprogenitor cells (NPCs). The ESCs used in our experiments were differentiated to NPCs, and the ribosomes of the NPCs were fractionated by velocity sedimentation using identical protocol and treatment as those used with ESCs; see the Methods and Extended Appendix for detailed description of the velocity sedimentation.

**Figure EV2. Multiple unique peptides per RP provide consistent fold-change estimates for most RPs.** (A) Number of unique peptides quantified per mouse RP digested by trypsin. (B) Distribution of coefficients of variation (CVs) of the measured fold-changes for mouse RPs digested by trypsin. (C) Number of unique peptides quantified per mouse RP digested by lys-C. (D) Distribution of coefficients of variation (CVs) of the measured fold-changes for mouse RPs digested by lys-C. (E) Number of unique peptides quantified per yeast RP digested by trypsin. (F) Distribution of coefficients of variation (CVs) of the measured fold-changes for yeast RPs digested by trypsin. The CVs for each RP quantify the consistency of fold-changes for that RP estimated from all quantified unique peptides whose amino acid sequences are found only in the RP and no other protein in the proteome. CVs are estimated as the standard deviation ( $\sigma$ ) of the fold-changes of unique peptides mapping to the same RP over the corresponding mean ( $\mu$ ) and are thus computed only for RPs that have multiple unique peptides. (D) Distribution of CVs of the measured fold-changes for mouse RPs.



**Figure EV3. RPs are over 100 fold more abundant than ribosome biogenesis proteins in the sucrose gradients.** Distributions of iBAQ scores for RPs and for ribosome biogenesis proteins. The iBAQ score of a protein estimates its absolute level based on the number of unique peptides for that protein and their corresponding integrated precursor areas. The levels of ribosome biogenesis proteins likely reflect the levels of the 90S preribosomal particles in our sucrose gradients.

**Figure EV4. Comparison of relative RP quantification by MS and Western Blots.**

(A) Polysomal enrichment of RPs quantified by MS. (B) Polysomal enrichment of RPs quantified by Western blots. RPs were quantified by Western blots in monosomes and polysomes from high passage–number E14 mouse ESCs. Rpl32 was used as a loading control and the boxplots summarize data from 9 ratios for each quantified RP.

**Figure EV5. Different RPs have different magnitudes of their growth-rate responses, i.e., transcriptional induction or repression with increasing growth rate.**

The heatmap displays transcript levels of RPs in yeast cultures growing at steady-state in glucose-limited minimal media at the growth-rates ( $\mu$ ) indicated by the bars on the top. To emphasize the growth-rate trends, the mRNA levels of each RP are displayed on a  $\log_2$  scale relative to their mean across all six growth rates. The RPs are sorted by their growth-rate slopes to emphasize the variability of their slopes, from highly positive to negative. All data are from (Slavov and Botstein, 2011; Brauer *et al*, 2008).

## Figure 1

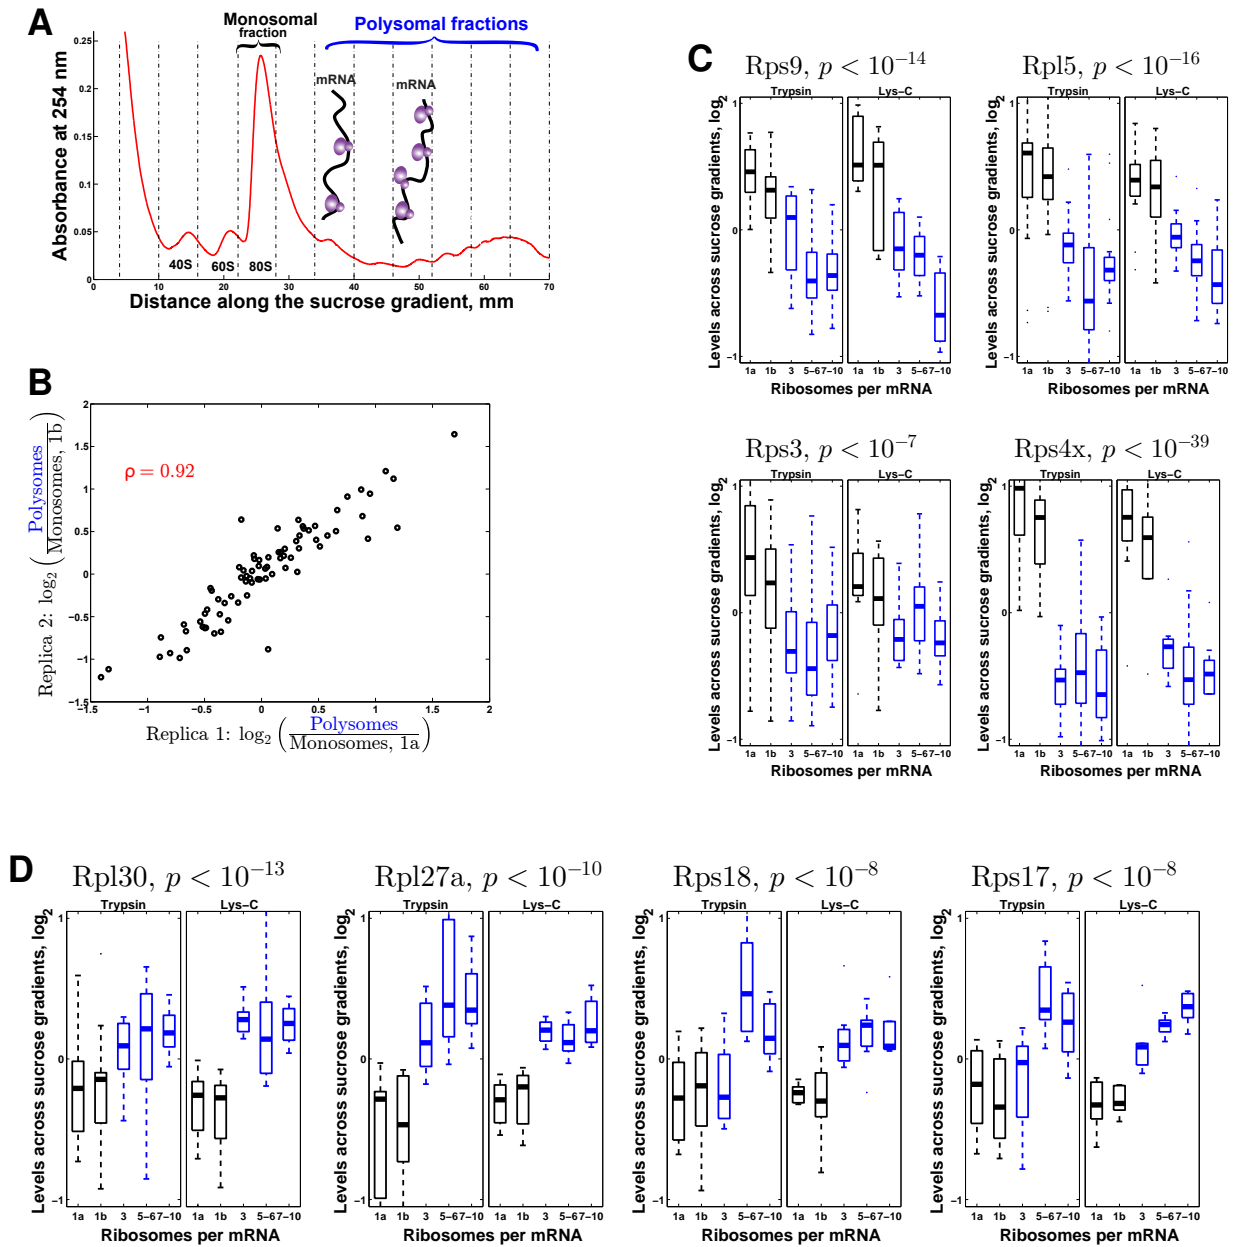



## Figure 3

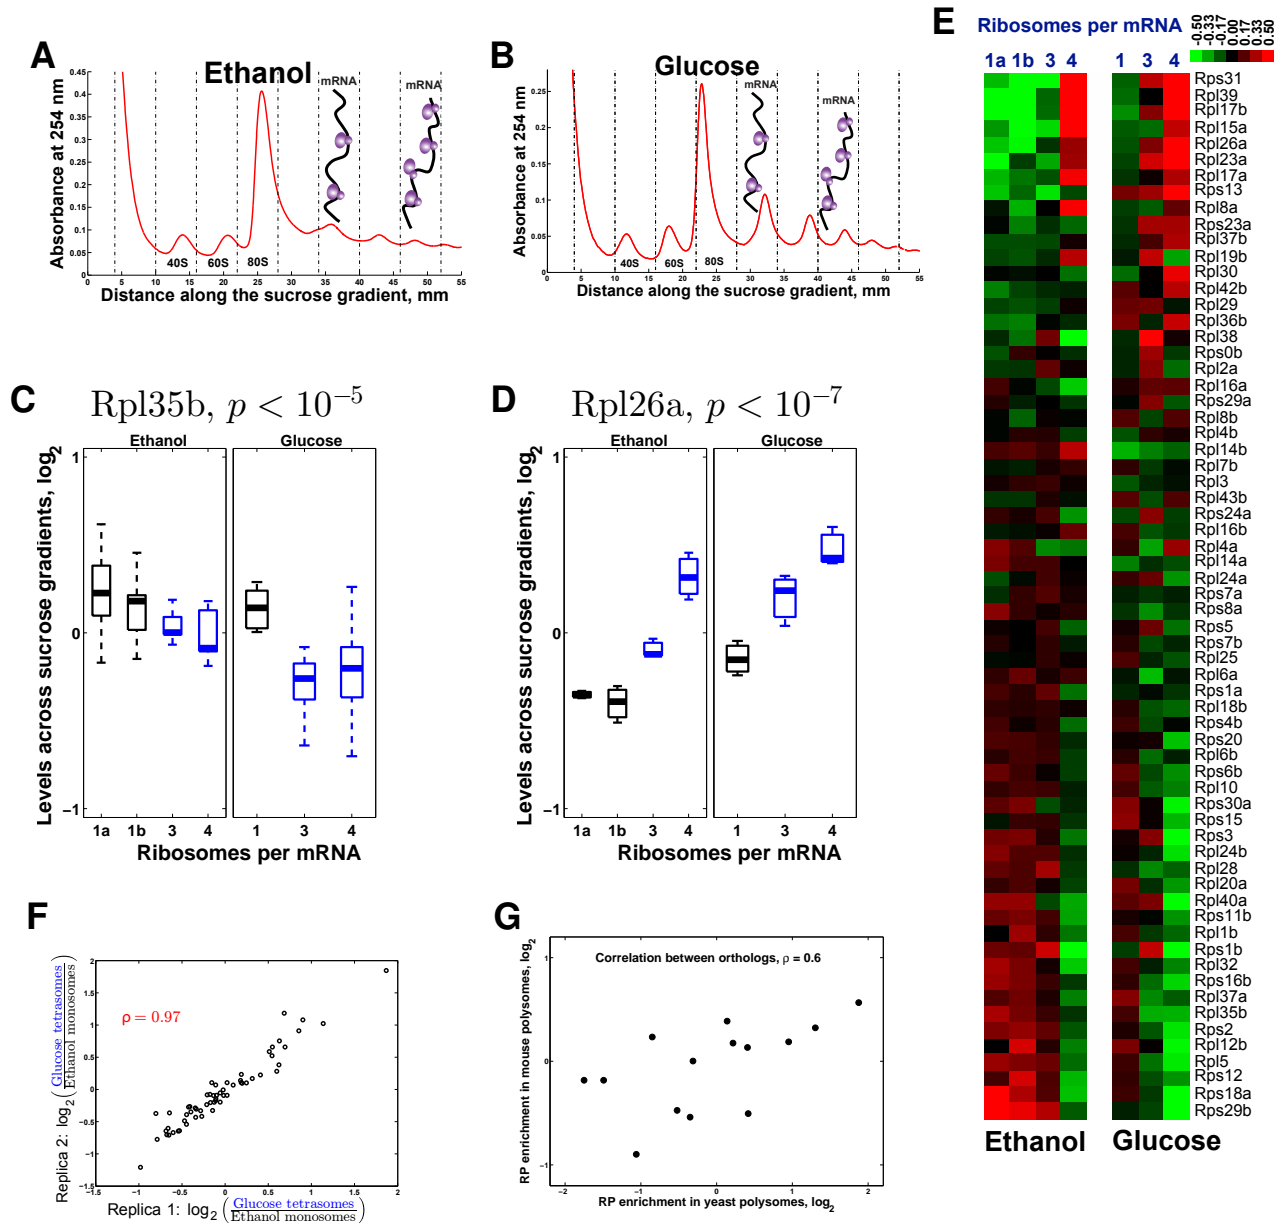

## Figure 4

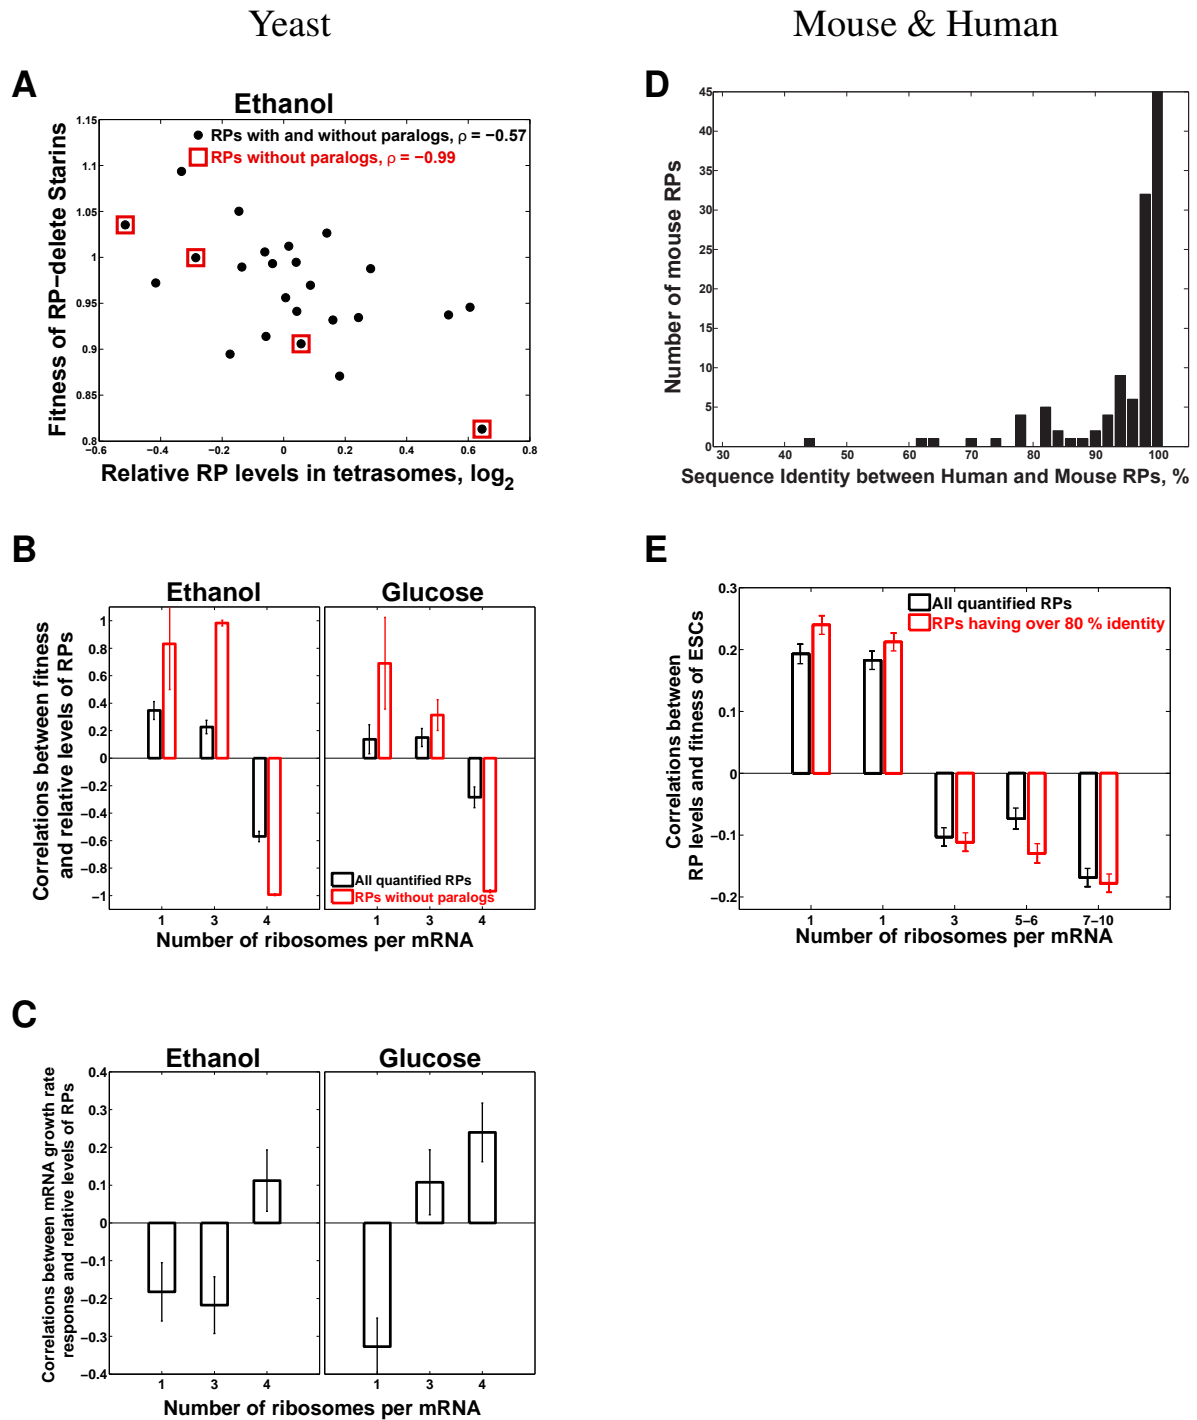

## Figure EV1

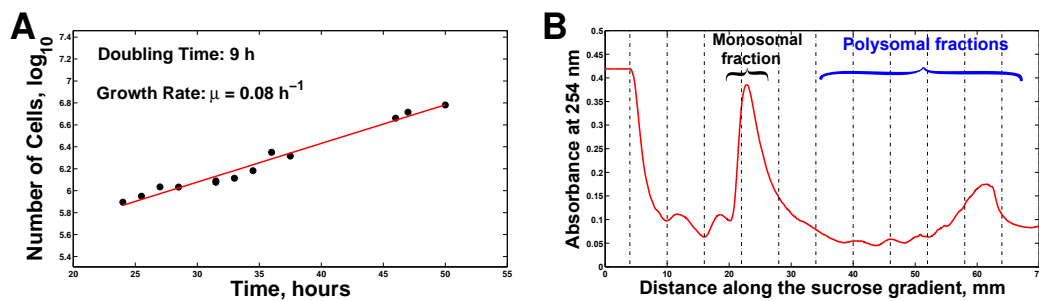

## Figure EV2

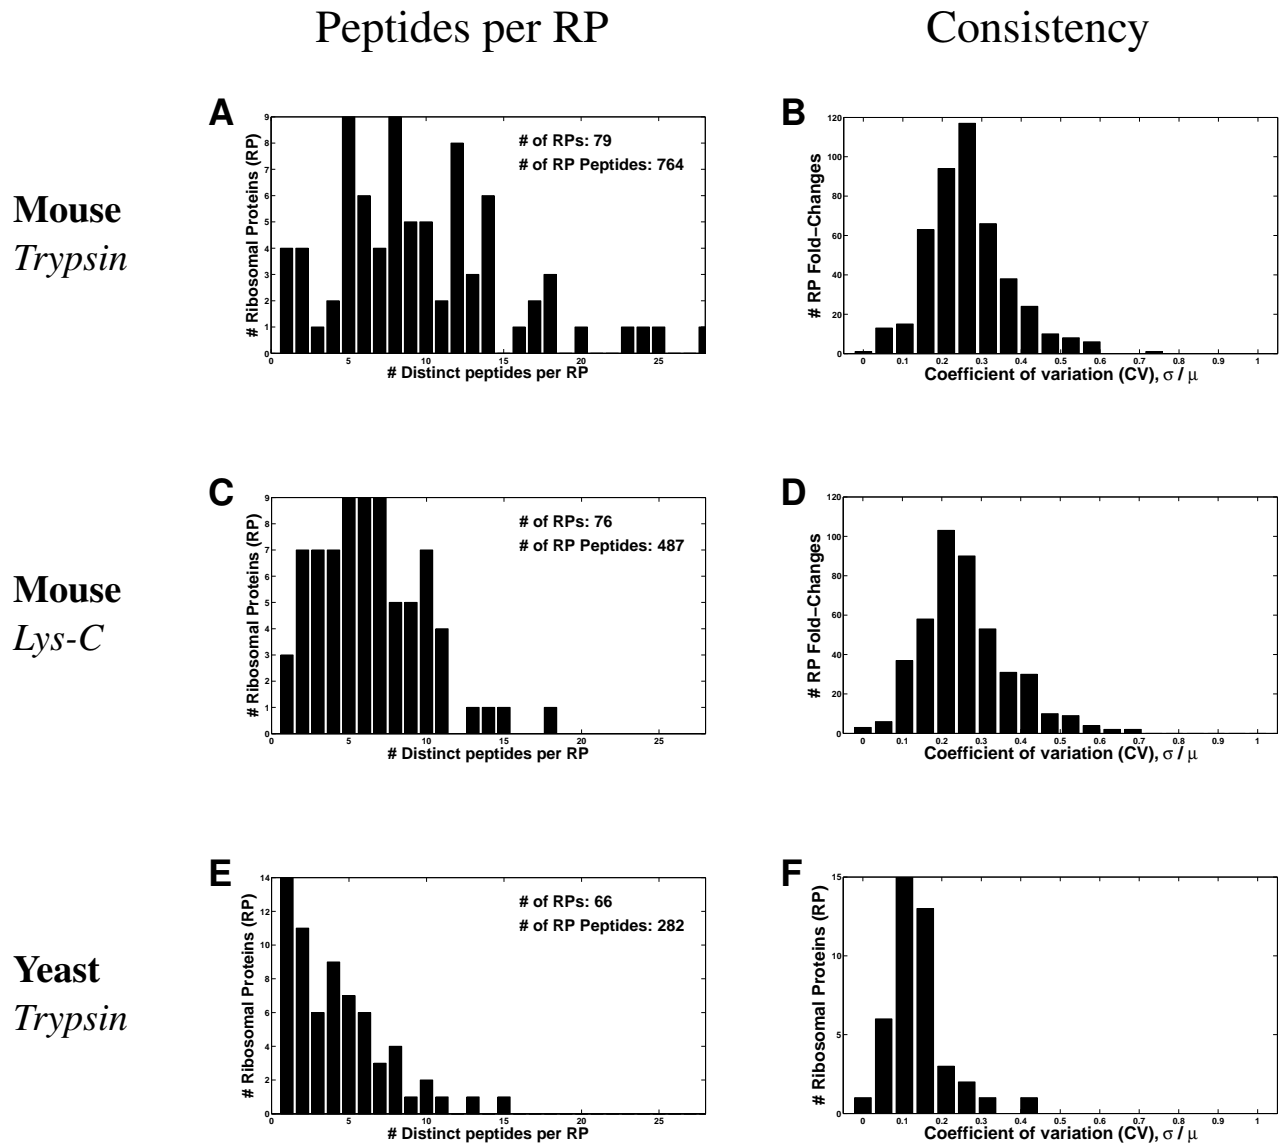

## Figure EV3

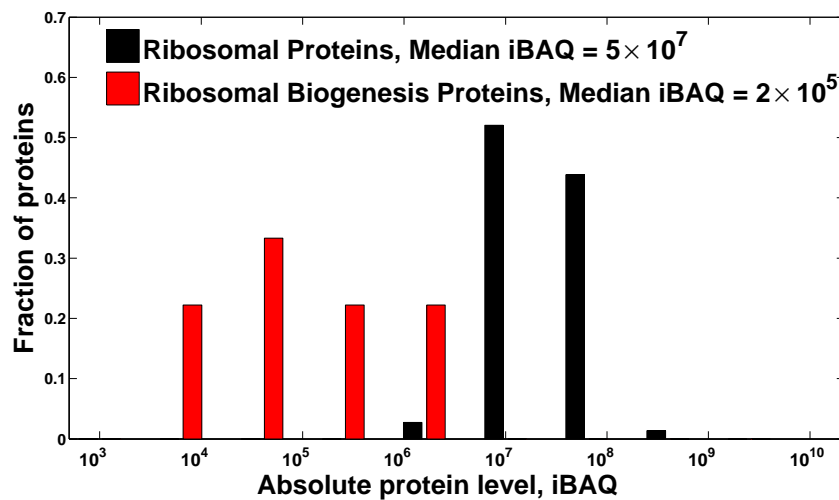



## Figure EV4

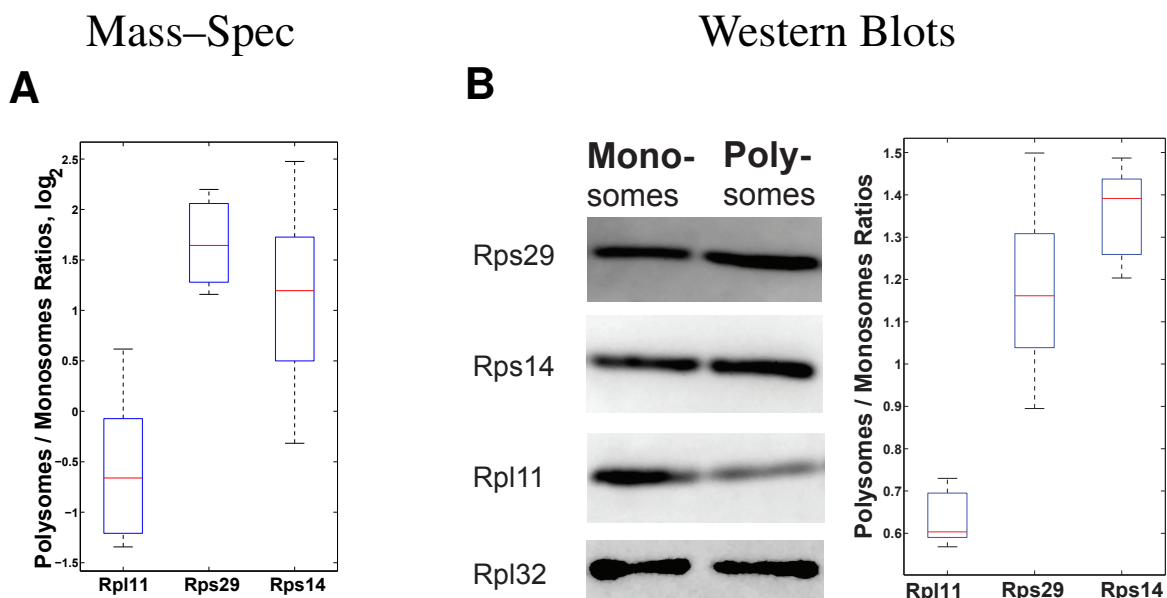

**Figure EV5**

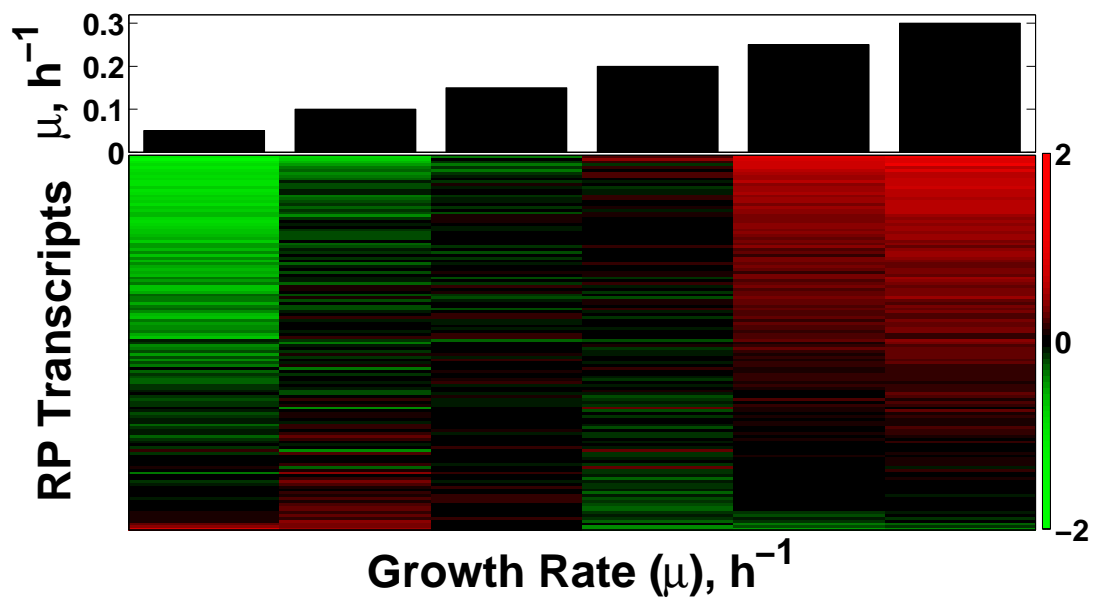

Source: http://www.biorxiv.org/content/10.1101/005553v3.full.pdf
